# Supplementary material for: The zoonotic potential of Clostridium difficile from small companion animals and their owners
Source: PubMed Central journal article supplement (PMC5825086; doi:10.1371/journal.pone.0193411), 2018-02-23
Supplement: pone.0193411.s001.pdf [file pone.0193411.s001.pdf]

## Untersuchungen zur Prävalenz und Typisierung von *Clostridium difficile* bei Haustieren und ihren Haltern

| I. Angaben zur Tierhaltung allgemein                                                                                                                                                                                                                                                                                                                                 |  |
|----------------------------------------------------------------------------------------------------------------------------------------------------------------------------------------------------------------------------------------------------------------------------------------------------------------------------------------------------------------------|--|
| 1. Halten Sie außer dem heute getesteten Tier weitere Nutz- oder Haustiere?<br><input type="checkbox"/> Ja <input type="checkbox"/> Nein <input type="checkbox"/> Keine Angabe                                                                                                                                                                                       |  |
| ↳ falls ja, welche Tiere (Mehrfachnennungen möglich)? Bitte geben Sie die Anzahl an: .....                                                                                                                                                                                                                                                                           |  |
| ..... Hunde    ..... Katzen    ..... Schafe    ..... Geflügel    ..... Wildtiere    ..... Kleinsäuger<br>..... Pferde    ..... Rinder    ..... Schweine    ..... andere (Tierart bitte angeben): .....                                                                                                                                                               |  |
| 2. Hatten Sie in den letzten 12 Monaten mehrfach Kontakt zu anderen Tieren, deren Besitzer nicht Sie sind? (z.B. Haustiere, Jagd...)?<br><input type="checkbox"/> Ja <input type="checkbox"/> Nein <input type="checkbox"/> Keine Angabe                                                                                                                             |  |
| ↳ falls ja, welche Tiere (Mehrfachnennungen möglich)                                                                                                                                                                                                                                                                                                                 |  |
| <input type="checkbox"/> Hunde <input type="checkbox"/> Katzen <input type="checkbox"/> Schafe <input type="checkbox"/> Geflügel <input type="checkbox"/> Wildtiere <input type="checkbox"/> Kleinsäuger<br><input type="checkbox"/> Pferde <input type="checkbox"/> Rinder <input type="checkbox"/> Schweine <input type="checkbox"/> andere (bitte angeben): ..... |  |

Aufkleber  
Tier ID

| II. Angaben zum getesteten Tier                                                                                                                                                                                                                                                                                                                                                                                                                                                                                                                                                                                                                       |                                                                                                     |                                                                               |                          |                          |                          |
|-------------------------------------------------------------------------------------------------------------------------------------------------------------------------------------------------------------------------------------------------------------------------------------------------------------------------------------------------------------------------------------------------------------------------------------------------------------------------------------------------------------------------------------------------------------------------------------------------------------------------------------------------------|-----------------------------------------------------------------------------------------------------|-------------------------------------------------------------------------------|--------------------------|--------------------------|--------------------------|
| 3. Bei dem getesteten Tier handelt es sich um: <input type="checkbox"/> Hund <input type="checkbox"/> Katze                                                                                                                                                                                                                                                                                                                                                                                                                                                                                                                                           |                                                                                                     |                                                                               |                          |                          |                          |
| 4. Rasse des Tieres?<br>.....                                                                                                                                                                                                                                                                                                                                                                                                                                                                                                                                                                                                                         | 5. Geschlecht des Tieres?<br><input type="checkbox"/> weiblich<br><input type="checkbox"/> männlich | 6. Kastriert?<br><input type="checkbox"/> Ja<br><input type="checkbox"/> Nein | 7. Alter:<br>..... Jahre |                          |                          |
| 8a) (falls Hund) Wie wird dieser Hund hauptsächlich (mehr als die Hälfte der Zeit) gehalten?<br><input type="checkbox"/> im Haus/in der Wohnung<br><input type="checkbox"/> im Zwinger/Garten<br><input type="checkbox"/> im separaten Nebengebäude (z.B. Stall)                                                                                                                                                                                                                                                                                                                                                                                      |                                                                                                     |                                                                               |                          |                          |                          |
| 8b) (falls Katze) Wie wird diese Katze gehalten?<br><input type="checkbox"/> im Haus/in der Wohnung<br><input type="checkbox"/> Freigänger<br>↳ falls Freigänger, wie häufig befindet sich Ihre Katze im Freien?<br><input type="checkbox"/> täglich: ..... Stunden pro Tag.<br><input type="checkbox"/> mehrmals in der Woche: ..... Stunden pro Woche                                                                                                                                                                                                                                                                                               |                                                                                                     |                                                                               |                          |                          |                          |
| 9. Hat Ihr Tier regelmäßigen Kontakt zu anderen Nutz- oder Haustieren?<br><input type="checkbox"/> Ja <input type="checkbox"/> Nein <input type="checkbox"/> Keine Angabe<br>↳ falls ja, zu welchen Tieren (Mehrfachnennungen möglich)?<br><input type="checkbox"/> Hunde <input type="checkbox"/> Katzen <input type="checkbox"/> Schafe <input type="checkbox"/> Geflügel <input type="checkbox"/> Wildtiere <input type="checkbox"/> Kleinsäuger<br><input type="checkbox"/> Pferde <input type="checkbox"/> Rinder <input type="checkbox"/> Schweine <input type="checkbox"/> andere (bitte angeben): .....                                       |                                                                                                     |                                                                               |                          |                          |                          |
| 10. Hatte Ihr Tier in den letzten 12 Monaten regelmäßigen Kontakt zu Jungtieren (z.B. Welpen, Ferkeln, ...)?<br><input type="checkbox"/> Ja <input type="checkbox"/> Nein <input type="checkbox"/> Keine Angabe<br>↳ falls ja, zu welchen Tieren (Mehrfachnennungen möglich)?<br><input type="checkbox"/> Hunde <input type="checkbox"/> Katzen <input type="checkbox"/> Schafe <input type="checkbox"/> Geflügel <input type="checkbox"/> Wildtiere <input type="checkbox"/> Kleinsäuger<br><input type="checkbox"/> Pferde <input type="checkbox"/> Rinder <input type="checkbox"/> Schweine <input type="checkbox"/> andere (bitte angeben): ..... |                                                                                                     |                                                                               |                          |                          |                          |
| 11. Welche Aussage ist zutreffend, wenn Sie für die letzten 12 Monate den Kontakt zu Ihrem Tier beschreiben?                                                                                                                                                                                                                                                                                                                                                                                                                                                                                                                                          |                                                                                                     |                                                                               |                          |                          |                          |
| Ihr Tier...                                                                                                                                                                                                                                                                                                                                                                                                                                                                                                                                                                                                                                           | Täglich                                                                                             | Mehrmals<br>in der Woche                                                      | Mehrmals<br>im Monat     | Selten                   | Nie                      |
| a) ... darf auf dem Sofa liegen                                                                                                                                                                                                                                                                                                                                                                                                                                                                                                                                                                                                                       | <input type="checkbox"/>                                                                            | <input type="checkbox"/>                                                      | <input type="checkbox"/> | <input type="checkbox"/> | <input type="checkbox"/> |
| b) ... darf mit in Ihr Bett                                                                                                                                                                                                                                                                                                                                                                                                                                                                                                                                                                                                                           | <input type="checkbox"/>                                                                            | <input type="checkbox"/>                                                      | <input type="checkbox"/> | <input type="checkbox"/> | <input type="checkbox"/> |
| c) ... wird in Ihrer Badewanne/Dusche gewaschen                                                                                                                                                                                                                                                                                                                                                                                                                                                                                                                                                                                                       | <input type="checkbox"/>                                                                            | <input type="checkbox"/>                                                      | <input type="checkbox"/> | <input type="checkbox"/> | <input type="checkbox"/> |
| d) ... wird von Ihnen gestreichelt/gekraut                                                                                                                                                                                                                                                                                                                                                                                                                                                                                                                                                                                                            | <input type="checkbox"/>                                                                            | <input type="checkbox"/>                                                      | <input type="checkbox"/> | <input type="checkbox"/> | <input type="checkbox"/> |
| e) ... darf aus der Hand fressen                                                                                                                                                                                                                                                                                                                                                                                                                                                                                                                                                                                                                      | <input type="checkbox"/>                                                                            | <input type="checkbox"/>                                                      | <input type="checkbox"/> | <input type="checkbox"/> | <input type="checkbox"/> |
| f) ... darf Ihr Gesicht lecken                                                                                                                                                                                                                                                                                                                                                                                                                                                                                                                                                                                                                        | <input type="checkbox"/>                                                                            | <input type="checkbox"/>                                                      | <input type="checkbox"/> | <input type="checkbox"/> | <input type="checkbox"/> |
| g) Sonstiger Kontakt zu dem Tier<br>(bitte angeben): .....                                                                                                                                                                                                                                                                                                                                                                                                                                                                                                                                                                                            | <input type="checkbox"/>                                                                            | <input type="checkbox"/>                                                      | <input type="checkbox"/> | <input type="checkbox"/> | <input type="checkbox"/> |

... weitere Angaben zum getesteten Tier...

12. Hat sich Ihr Tier innerhalb der letzten 12 Monate in einer der folgenden Einrichtungen aufgehalten?

|                                                       |                                                                     |                               |
|-------------------------------------------------------|---------------------------------------------------------------------|-------------------------------|
| a) Tierpension                                        | <input type="checkbox"/> Ja: Wann zuletzt (Monat/Jahr)? ...../..... | <input type="checkbox"/> Nein |
| b) Tierheim                                           | <input type="checkbox"/> Ja: Wann zuletzt (Monat/Jahr)? ...../..... | <input type="checkbox"/> Nein |
| c) Kindertagesstätte, Schule                          | <input type="checkbox"/> Ja: Wann zuletzt (Monat/Jahr)? ...../..... | <input type="checkbox"/> Nein |
| d) Tierschau/Ausstellung                              | <input type="checkbox"/> Ja: Wann zuletzt (Monat/Jahr)? ...../..... | <input type="checkbox"/> Nein |
| e) Pflege-Einrichtung / Reha-Einrichtung              | <input type="checkbox"/> Ja: Wann zuletzt (Monat/Jahr)? ...../..... | <input type="checkbox"/> Nein |
| f) als Therapie-Tier eingesetzt (z.B. im Krankenhaus) | <input type="checkbox"/> Ja: Wann zuletzt (Monat/Jahr)? ...../..... | <input type="checkbox"/> Nein |
| g) Hundeschule / Hundesport                           | <input type="checkbox"/> Ja: Wann zuletzt (Monat/Jahr)? ...../..... | <input type="checkbox"/> Nein |

13. Welches der folgenden Futtermittel frisst Ihr Tier? (Mehrfachantworten möglich)

Nassfutter aus Dose oder Beutel

Trockenfutter

Trockenfleischprodukte (z.B. Schweineohr)

Frischfleisch, roh (z.B. Pansen etc.)

Speisereste/Tischabfälle

Leckerlies (z.B. Kauknochen, Katzensticks etc.)

Ergänzungsfuttermittel (z.B. Vitamin- oder Mineralstoffpräparate)

sonstiges (bitte angeben): .....

14. Neigt Ihr Tier zu...?

|                                                      |                             |                               |                                    |
|------------------------------------------------------|-----------------------------|-------------------------------|------------------------------------|
| a) Fressen von Kot (Koprophagie)                     | <input type="checkbox"/> Ja | <input type="checkbox"/> Nein | <input type="checkbox"/> unbekannt |
| b) Gefräßigkeit, z.B. Aufnahme von Müll (Polyphagie) | <input type="checkbox"/> Ja | <input type="checkbox"/> Nein | <input type="checkbox"/> unbekannt |
| c) Appetitlosigkeit (Inappetenz)                     | <input type="checkbox"/> Ja | <input type="checkbox"/> Nein | <input type="checkbox"/> unbekannt |

15. Leidet Ihr Tier an einer akuten Erkrankung? (kurzer Krankheitsverlauf von 3-14 Tagen)

Ja, und zwar: .....  Nein  unbekannt

16. Leidet Ihr Tier an chronischen Erkrankungen? (langer Krankheitsverlauf von über 14 Tagen, z.B. Diabetes, Hauterkrankung, Tumor, Epilepsie...)

Ja, und zwar: .....  Nein  unbekannt

17. Muss Ihr Tier regelmäßig entzündungshemmende Medikamente (z.B. Metacam®, Rimadyl®) einnehmen?

Ja  Nein  unbekannt  keine Angabe

☞ falls ja, seit wann? (Monat/Jahr)? ...../.....

18. Muss Ihr Tier regelmäßig Magensäure-blockende Medikamente einnehmen? (sog. Protonenpumpenhemmer, z.B. Omeprazol)

Ja  Nein  unbekannt  keine Angabe

☞ falls ja, seit wann? (Monat/Jahr)? ...../.....

19. Wurde Ihr Tier innerhalb der letzten 3 Monate mit Antibiotika behandelt? (außer Wurmkur)

Ja  Nein  unbekannt  Keine Angabe

☞ falls ja: Warum? Diagnose/Erkrankung: .....

Wann? (Monat/Jahr)? ...../.....

Wie?  Lokale Behandlung (Salben, Augentropfen)

Systemische Behandlung (Tabletten, Spritzen, o.ä.)

20. Hatte Ihr Tier in den letzten 4 Wochen Durchfall? (Unter Durchfall verstehen wir mehr als 3 ungeformte Stühle/Tag.)

Ja  Nein  unbekannt  Keine Angabe

☞ falls ja, wie lange dauerte der Durchfall an?

wenige Tage bis max. 3 Wochen  länger als 3 Wochen  keine Angabe

21. Hatte Ihr Tier innerhalb der letzten 12 Monate Kontakt zu einem Menschen oder Tier mit Durchfall?

Ja  Nein  unbekannt  Keine Angabe

☞ falls ja,  zu einem Menschen. Wann letztmalig? (Monat/Jahr)? ...../.....

zu einem Tier. Wann letztmalig? (Monat/Jahr)? ...../.....

22. Hatte Ihr Tier innerhalb der letzten 12 Monate einen stationären Aufenthalt in einer Tierklinik?

Ja: Wann war der letzte Aufenthalt? (Monat/Jahr)? ...../.....  Nein  unbekannt

23. Hatte Ihr Tier innerhalb der letzten 12 Monate Kontakt zu einem anderen Patienten (Mensch oder Tier) nachdem dieser kurz zuvor in einer Klinik behandelt wurde?

Ja  Nein  unbekannt  Keine Angabe

☞ falls ja,  zu einem Menschen. Wann letztmalig? (Monat/Jahr)? ...../.....

zu einem Tier. Wann letztmalig? (Monat/Jahr)? ...../.....

Aufkleber  
Person ID

| III. Angaben zum Tierhalter / zur Tierhalterin                                                                                                                                                                                                                                                                                                                                                                                                                                                                        |                          |                          |                          |                          |                          |
|-----------------------------------------------------------------------------------------------------------------------------------------------------------------------------------------------------------------------------------------------------------------------------------------------------------------------------------------------------------------------------------------------------------------------------------------------------------------------------------------------------------------------|--------------------------|--------------------------|--------------------------|--------------------------|--------------------------|
| 24. In welchem Bundesland wohnen Sie? .....                                                                                                                                                                                                                                                                                                                                                                                                                                                                           |                          |                          |                          |                          |                          |
| 25. Wie würden Sie Ihr Wohnumfeld beschreiben?<br><input type="checkbox"/> Großstadt<br><input type="checkbox"/> Kleinstadt<br><input type="checkbox"/> Auf dem Land<br><input type="checkbox"/> Keine Angabe                                                                                                                                                                                                                                                                                                         |                          |                          |                          |                          |                          |
| 26. Geburtsdatum (Monat/Jahr)? ...../.....                                                                                                                                                                                                                                                                                                                                                                                                                                                                            |                          |                          |                          |                          |                          |
| 27. Geschlecht<br><input type="checkbox"/> weiblich <input type="checkbox"/> männlich                                                                                                                                                                                                                                                                                                                                                                                                                                 |                          |                          |                          |                          |                          |
| 28. In welchem Beruf bzw. Tätigkeitsfeld sind Sie aktuell tätig (Mehrfachnennungen möglich)?<br><input type="checkbox"/> Landwirtschaft, und zwar als: .....<br><input type="checkbox"/> Nahrungsmittelproduktion, und zwar als: .....<br><input type="checkbox"/> Gesundheitswesen, und zwar als: .....<br><input type="checkbox"/> anderer Tätigkeitsbereich, und zwar als: .....<br><input type="checkbox"/> aktuell keine berufliche Tätigkeit (Elternzeit, Rente, etc.)<br><input type="checkbox"/> keine Angabe |                          |                          |                          |                          |                          |
| 29. Leben in Ihrem Haushalt Kinder bis 16 Jahre?<br><input type="checkbox"/> Ja <input type="checkbox"/> Nein <input type="checkbox"/> keine Angabe<br>☞ falls ja, bitte geben Sie an wie viele Kinder in welcher Altersgruppe sind:<br>Anzahl der Kinder unter 2 Jahre: ..... Kind/er<br>Anzahl der Kinder 2 bis 9 Jahre: ..... Kind/er<br>Anzahl der Kinder 10 bis 16 Jahre: ..... Kind/er                                                                                                                          |                          |                          |                          |                          |                          |
| 30. Lebt in Ihrem Haushalt eine Person, die an einer chronischen Erkrankung leidet?<br><input type="checkbox"/> Ja <input type="checkbox"/> Nein <input type="checkbox"/> unbekannt <input type="checkbox"/> keine Angabe<br>☞ falls ja, welche Erkrankung? .....                                                                                                                                                                                                                                                     |                          |                          |                          |                          |                          |
| 31. Lebt in Ihrem Haushalt eine Person oder ein Tier, bei der <i>Clostridium difficile</i> nachgewiesen wurde?<br><input type="checkbox"/> Ja <input type="checkbox"/> Nein <input type="checkbox"/> unbekannt <input type="checkbox"/> keine Angabe<br>☞ falls ja, <input type="checkbox"/> bei einem Menschen. Wann? (Monat/Jahr)? ...../.....<br><input type="checkbox"/> bei einem Tier. Wann? (Monat/Jahr)? ...../.....                                                                                          |                          |                          |                          |                          |                          |
| 32. Welche der folgenden Lebensmittel nehmen Sie zu sich?                                                                                                                                                                                                                                                                                                                                                                                                                                                             |                          |                          |                          |                          |                          |
|                                                                                                                                                                                                                                                                                                                                                                                                                                                                                                                       | Täglich                  | Mehrmals<br>in der Woche | Mehrmals<br>im Monat     | Selten                   | Nie                      |
| ... Leitungswasser als Kaltgetränk                                                                                                                                                                                                                                                                                                                                                                                                                                                                                    | <input type="checkbox"/> | <input type="checkbox"/> | <input type="checkbox"/> | <input type="checkbox"/> | <input type="checkbox"/> |
| ... Rohmilch/-produkte                                                                                                                                                                                                                                                                                                                                                                                                                                                                                                | <input type="checkbox"/> | <input type="checkbox"/> | <input type="checkbox"/> | <input type="checkbox"/> | <input type="checkbox"/> |
| ... Rohfleisch/-produkte (z.B. Hackfleisch)                                                                                                                                                                                                                                                                                                                                                                                                                                                                           | <input type="checkbox"/> | <input type="checkbox"/> | <input type="checkbox"/> | <input type="checkbox"/> | <input type="checkbox"/> |
| ... abgepackte Salate                                                                                                                                                                                                                                                                                                                                                                                                                                                                                                 | <input type="checkbox"/> | <input type="checkbox"/> | <input type="checkbox"/> | <input type="checkbox"/> | <input type="checkbox"/> |
| ... probiotische Drinks (z.B. Actimel®)                                                                                                                                                                                                                                                                                                                                                                                                                                                                               | <input type="checkbox"/> | <input type="checkbox"/> | <input type="checkbox"/> | <input type="checkbox"/> | <input type="checkbox"/> |
| 33. Hatten Sie innerhalb der letzten 12 Monate Kontakt zu einem Menschen oder Tier mit Durchfall?<br><input type="checkbox"/> Ja <input type="checkbox"/> Nein <input type="checkbox"/> unbekannt <input type="checkbox"/> keine Angabe<br>☞ falls ja, <input type="checkbox"/> zu einem Menschen. Wann letztmalig? (Monat/Jahr)? ...../.....<br><input type="checkbox"/> zu einem Tier. Wann letztmalig? (Monat/Jahr)? ...../.....                                                                                   |                          |                          |                          |                          |                          |
| 34. Hatten Sie innerhalb der letzten 12 Monate einen Klinikaufenthalt von mindestens einer Woche?<br><input type="checkbox"/> Ja: Wann war der letzte Aufenthalt? (Monat/Jahr)? ...../..... <input type="checkbox"/> Nein <input type="checkbox"/> unbekannt <input type="checkbox"/> keine Angabe                                                                                                                                                                                                                    |                          |                          |                          |                          |                          |
| 35. Hatten Sie Kontakt zu einem anderen Patienten (Mensch oder Tier), nachdem dieser in den letzten 12 Monaten in einer Klinik behandelt wurde?<br><input type="checkbox"/> Ja <input type="checkbox"/> Nein <input type="checkbox"/> unbekannt <input type="checkbox"/> keine Angabe<br>☞ falls ja, <input type="checkbox"/> zu einem Menschen. Wann? (Monat/Jahr)? ...../.....<br><input type="checkbox"/> zu einem Tier. Wann? (Monat/Jahr)? ...../.....                                                           |                          |                          |                          |                          |                          |

| ... weitere Angaben zum Tierhalter / zur Tierhalterin                                                                      |                                                                                                                                                     |
|----------------------------------------------------------------------------------------------------------------------------|-----------------------------------------------------------------------------------------------------------------------------------------------------|
| 36. Hatten Sie in den letzten 4 Wochen Durchfall?<br>(Unter Durchfall verstehen wir mehr als 3 ungeformte Stühle pro Tag.) | <input type="checkbox"/> Ja <input type="checkbox"/> Nein <input type="checkbox"/> unbekannt <input type="checkbox"/> keine Angabe                  |
| ↳ falls ja, wie lange dauerte der Durchfall an?                                                                            | <input type="checkbox"/> wenige Tage bis max. 3 Wochen <input type="checkbox"/> länger als 3 Wochen <input type="checkbox"/> unbekannt              |
| 37. Nehmen Sie regelmäßig entzündungshemmende Medikamente (z.B. Aspirin®, Ibuprofen) ein?                                  | <input type="checkbox"/> Ja <input type="checkbox"/> Nein <input type="checkbox"/> unbekannt <input type="checkbox"/> keine Angabe                  |
| ↳ falls ja, seit wann? (Monat/Jahr)?                                                                                       | ...../.....                                                                                                                                         |
| 38. Nehmen Sie regelmäßig Magensäure-blockende Medikamente ein?<br>(sog. Protonenpumpenhemmer, z.B. Nexium®, Pantozol®)    | <input type="checkbox"/> Ja <input type="checkbox"/> Nein <input type="checkbox"/> unbekannt <input type="checkbox"/> keine Angabe                  |
| ↳ falls ja, seit wann? (Monat/Jahr)?                                                                                       | ...../.....                                                                                                                                         |
| 39. Hatten Sie innerhalb der letzten 12 Monate Kontakt zu einem Durchfall-Patienten (Mensch oder Tier)?                    | <input type="checkbox"/> Ja <input type="checkbox"/> Nein <input type="checkbox"/> unbekannt <input type="checkbox"/> keine Angabe                  |
| ↳ falls ja, <input type="checkbox"/> zu einem Menschen. Wann letztmalig? (Monat/Jahr)?                                     | ...../.....                                                                                                                                         |
| <input type="checkbox"/> zu einem Tier. Wann letztmalig? (Monat/Jahr)?                                                     | ...../.....                                                                                                                                         |
| 40. Wurden Sie innerhalb der letzten 2 Monate mit Antibiotika behandelt?                                                   | <input type="checkbox"/> Ja <input type="checkbox"/> Nein <input type="checkbox"/> unbekannt <input type="checkbox"/> Keine Angabe                  |
| ↳ falls ja: Warum? Diagnose/Erkrankung: .....                                                                              |                                                                                                                                                     |
| Wann? (Monat/Jahr)?                                                                                                        | ...../.....                                                                                                                                         |
| Wie? <input type="checkbox"/> Lokale Behandlung (Salben, Augentropfen)                                                     |                                                                                                                                                     |
| <input type="checkbox"/> Systemische Behandlung (Tabletten, Spritzen, o.ä.)                                                |                                                                                                                                                     |
| 41. Wurden Sie innerhalb des letzten Jahres mit einer Chemotherapie behandelt?                                             | <input type="checkbox"/> Ja <input type="checkbox"/> Nein <input type="checkbox"/> keine Angabe                                                     |
| 42. Leiden Sie an einer chronischen Erkrankung (z.B. Diabetes, Neurodermitis, u.a.)?                                       | <input type="checkbox"/> Ja <input type="checkbox"/> Nein <input type="checkbox"/> keine Angabe                                                     |
| ↳ falls ja, welche Erkrankung?                                                                                             | .....                                                                                                                                               |
| 43. Ist bei Ihnen schon einmal <i>Clostridium difficile</i> nachgewiesen worden?                                           | <input type="checkbox"/> Ja <input type="checkbox"/> Nein <input type="checkbox"/> unbekannt <input type="checkbox"/> Keine Angabe                  |
| ↳ falls ja, hatten Sie dabei assoziierte Krankheitssymptome?                                                               | <input type="checkbox"/> Ja, und zwar: ..... <input type="checkbox"/> Nein <input type="checkbox"/> unbekannt <input type="checkbox"/> keine Angabe |

#### IV. Sonstiges

44. Dürfen wir Sie bei weiteren Fragen im Rahmen dieser Studie nochmals kontaktieren?
- Ja  Nein

Vielen Dank für Ihre Mitarbeit!
