# Supplementary material for: The zoonotic potential of Clostridium difficile from small companion animals and their owners
Source: PubMed Central journal article supplement (PMC5825086; doi:10.1371/journal.pone.0193411), 2018-02-23
Supplement: pone.0193411.s002.pdf [file pone.0193411.s002.pdf]

**I. General information about animal contacts**

1. Have you got other pets or animals apart from the participating animal?  
 Yes                       No                                       n/a

↳ if applicable, which animals? (check all that apply) – Please, specify the quantity .....

.....dogs      .....cats      .....sheep      .....poultry      .....wild animals      .....rabbits and other small mammals

.....horses      .....cattle      .....pigs      .....others (please specify): .....

---

2. Have you been several times in contact with other animals (of which you are not the owner) during the last 12 months? (e.g. pets, hunt...)?  
 Yes                       No                                       n/a

↳ if applicable, which animals? (check all that apply)

dogs       cats       sheep       poultry       wild animals       rabbits and other small mammals

horses       cattle       pigs       others (please specify): .....

**II. Information about the tested animal**

3. The tested animal is a:  dog       cat

|                                                      |                                                                                |                                                                             |                        |
|------------------------------------------------------|--------------------------------------------------------------------------------|-----------------------------------------------------------------------------|------------------------|
| 4. Which species does the animal belong to?<br>..... | 5. Gender?<br><input type="checkbox"/> female<br><input type="checkbox"/> male | 6. Neutered?<br><input type="checkbox"/> Yes<br><input type="checkbox"/> No | 7. Age:<br>..... years |
|------------------------------------------------------|--------------------------------------------------------------------------------|-----------------------------------------------------------------------------|------------------------|

8a) (if tested animal is a dog) Where is the dog most of the times (more than half of the time)?  
 in the house/flat  
 in a kennel/garden  
 in a separate building (e.g. in a stable)

8b) (if tested animal is a cat) Where is the cat most of the times?  
 in the house/flat  
 outdoors

↳ if the tested animal is an outdoor-cat, how often is it outside?  
 daily: ..... hours per day  
 several times a week: ..... hours per week

9. Is the animal in regular contact with other companion animals or livestock?  
 Yes                                       No                                       n/A

↳ if applicable, which animals? (check all that apply)

dogs       cats       sheep       poultry       wild animals       small companion animals

horses       cattle       pigs       others (please specify): .....

10. Has the tested animal been in contact with neonates/young animals during the last 12 months (e.g., dog puppies, piglets, ...)?  
 Yes                                       No                                       n/A

↳ if applicable, which animals? (check all that apply)

dogs       cats       sheep       poultry       wild animals       small companion animals

horses       cattle       pigs       others (please specify): .....

11. Which of the following is applicable between owner and animal during the last 12 months?

| The animal is ...                         | Daily                    | Several times per week   | Several times per month  | Rarely                   | Never                    |
|-------------------------------------------|--------------------------|--------------------------|--------------------------|--------------------------|--------------------------|
| a) ...allowed to lie on the couch         | <input type="checkbox"/> | <input type="checkbox"/> | <input type="checkbox"/> | <input type="checkbox"/> | <input type="checkbox"/> |
| b) ...allowed to sleep in the owner's bed | <input type="checkbox"/> | <input type="checkbox"/> | <input type="checkbox"/> | <input type="checkbox"/> | <input type="checkbox"/> |
| c) ...washed in the tub/shower            | <input type="checkbox"/> | <input type="checkbox"/> | <input type="checkbox"/> | <input type="checkbox"/> | <input type="checkbox"/> |
| d) ...petted                              | <input type="checkbox"/> | <input type="checkbox"/> | <input type="checkbox"/> | <input type="checkbox"/> | <input type="checkbox"/> |
| e) ...allowed to feed out of the hand     | <input type="checkbox"/> | <input type="checkbox"/> | <input type="checkbox"/> | <input type="checkbox"/> | <input type="checkbox"/> |
| f) ...is allowed to lick the owner's face | <input type="checkbox"/> | <input type="checkbox"/> | <input type="checkbox"/> | <input type="checkbox"/> | <input type="checkbox"/> |
| g) other contacts                         | <input type="checkbox"/> | <input type="checkbox"/> | <input type="checkbox"/> | <input type="checkbox"/> | <input type="checkbox"/> |
| (please specify):.....                    |                          |                          |                          |                          |                          |

12. Has the tested animal been in any of the following facilities during the last 12 months?
- |                                               |                                                                      |                             |
|-----------------------------------------------|----------------------------------------------------------------------|-----------------------------|
| a) kennels/boarding facilities                | <input type="checkbox"/> Yes: when at last (month/year)? ...../..... | <input type="checkbox"/> No |
| b) animal shelter                             | <input type="checkbox"/> Yes: when at last (month/year)? ...../..... | <input type="checkbox"/> No |
| c) kindergarten, school                       | <input type="checkbox"/> Yes: when at last (month/year)? ...../..... | <input type="checkbox"/> No |
| d) Dog-/cat-show                              | <input type="checkbox"/> Yes: when at last (month/year)? ...../..... | <input type="checkbox"/> No |
| e) Health care/rehabilitation facility        | <input type="checkbox"/> Yes: when at last (month/year)? ...../..... | <input type="checkbox"/> No |
| f) in use as a therapy dog (e.g. in hospital) | <input type="checkbox"/> Yes: when at last (month/year)? ...../..... | <input type="checkbox"/> No |
| g) pet obedience school                       | <input type="checkbox"/> Yes: when at last (month/year)? ...../..... | <input type="checkbox"/> No |

...more information about the tested animal...

13. Which of the following does the tested animal feed on? (check all that apply)

- Canned food  
 Dry food  
 Jerky (e.g. dried pig ears)  
 Raw meat (products) (e.g. rumen)  
 Leftovers  
 Dog/cat treats (e.g. dog chew bones, cat chew treats)  
 Nutritional supplements (e.g. vitamin or mineral additives)  
 Others (please specify): .....

14. Is the tested animal prone to ...?

- |                                                                       |                              |                             |                                  |
|-----------------------------------------------------------------------|------------------------------|-----------------------------|----------------------------------|
| a) Feeding on faeces (coprophagy)                                     | <input type="checkbox"/> Yes | <input type="checkbox"/> No | <input type="checkbox"/> unknown |
| b) Uncontrolled greedy feeding, e.g. consumption of waste (polyphagy) | <input type="checkbox"/> Yes | <input type="checkbox"/> No | <input type="checkbox"/> unknown |
| c) loss of appetite (inappetence)                                     | <input type="checkbox"/> Yes | <input type="checkbox"/> No | <input type="checkbox"/> unknown |

15. Does the tested animal suffer from an acute disease? (short period of 3-14 days)

- Yes, from: .....  No  unknown

16. Does the tested animal suffer from a chronic disease? (long period over 14 days, e.g. diabetes, skin disease, tumor, epilepsy)

- Yes, from: .....  No  unknown

17. Does the tested animal regularly take in anti-inflammatory drugs (e.g. Metacam®, Rimadyl®)?

- Yes  No  unknown  n/A

↳ if applicable, since when? (month/year)? ...../.....

18. Does the tested animal regularly take in drugs to reduce gastric acidity (so called proton pump inhibitors, e.g. Omeprazol)?

- Yes  No  unknown  n/A

↳ if applicable, since when? (month/year)? ...../.....

19. Has the tested animal been treated with antibiotics during the last 3 months? (no anthelmintic therapy)

- Yes  No  unknown  n/A

↳ if applicable: Why? Diagnosis/Disease: .....  
When? (month/year)? ...../.....

- How?  local treatment (ointment, eyedrops)  
 systemic treatment (drugs, syringe)

20. Has the tested animal suffered from diarrhoea during the last 4 weeks?  
(Diarrhoea as in terms of more than 3 unformed faeces/day)

- Yes  No  unknown  n/A

↳ if applicable, how long did the diarrhoea last?

- a few days until max. 3 weeks  longer than 3 weeks  n/A

21. Has the tested animal been in contact with a human or animal suffering from diarrhoea?

- Yes  No  unknown  n/A

↳ if applicable:  to a human. When at last? (month/year)? ...../.....

to an animal. When at last? (month/year)? ...../.....

22. Has the tested animal been hospitalized in a veterinary clinic during the last 12 months?  
 Yes: When at last? (month/year)? ..... / .....  
 No  unknown

23. During the last 12 months has the tested animal been in contact with a patient (human or animal) who had been recently hospitalized?  
 Yes  No  unknown  n/A  
 ↳ if applicable:  to a human. When at last? (month/year)? ..... / .....  
 to an animal. When at last? (month/year)? ..... / .....

**III. Information about the animal owner**

24. In which district of Germany do you live in? .....

25. How would you describe your residential environment?  
 large city  
 provincial city  
 countryside  
 n/A

26. Date of birth (month/year)? ..... / .....

27. Gender  
 female  male

28. Which is your current field of occupation (check all that apply)?  
 in agriculture, as: .....  
 in food production, as: .....  
 in health care, as: .....  
 other field of occupation: .....  
 currently not occupied (parental leave, retirement, etc.)  
 n/A

29. Do children younger than 16 years of age live in your household?  
 Yes  No  unknown  
 ↳ if applicable, please specify how many children in the following age groups:  
 number of children younger than 2 years: ..... child/ren  
 number of children between 2 and 9 years: ..... child/ren  
 number of children between 10 and 16 years: ..... child/ren

30. Does a chronically sick person live in your household?  
 Yes  No  unknown  n/A  
 ↳ if applicable, which disease? .....

31. Has a person or animal living in your household previously been tested positive for *Clostridium difficile*?  
 Yes  No  unknown  n/A  
 ↳ if applicable:  a person. When? (month/year)? ..... / .....  
 an animal. When? (month/year)? ..... / .....

32. Which of the following food/drinks do you consume?

|                                   | Daily                    | Several times per week   | Several times per month  | Rarely                   | Never                    |
|-----------------------------------|--------------------------|--------------------------|--------------------------|--------------------------|--------------------------|
| h) Tap water as a cold drink      | <input type="checkbox"/> | <input type="checkbox"/> | <input type="checkbox"/> | <input type="checkbox"/> | <input type="checkbox"/> |
| i) Raw milk-products              | <input type="checkbox"/> | <input type="checkbox"/> | <input type="checkbox"/> | <input type="checkbox"/> | <input type="checkbox"/> |
| j) Raw meat-products (e.g. mince) | <input type="checkbox"/> | <input type="checkbox"/> | <input type="checkbox"/> | <input type="checkbox"/> | <input type="checkbox"/> |
| k) Ready-to-eat-salads            | <input type="checkbox"/> | <input type="checkbox"/> | <input type="checkbox"/> | <input type="checkbox"/> | <input type="checkbox"/> |
| l) Probiotics (e.g. Actimel®)     | <input type="checkbox"/> | <input type="checkbox"/> | <input type="checkbox"/> | <input type="checkbox"/> | <input type="checkbox"/> |

33. Have you been in contact with a human or animal suffering from diarrhoea during the last 12 months?  
 Yes  No  unknown  n/A  
 ↳ if applicable:  with a human. When at last? (month/year)? ..... / .....  
 with an animal. When at last? (month/year)? ..... / .....

34. Have you been hospitalized for at least one week during the last 12 months?  
 Yes: When was the last stay (month/year): ..... / .....  No  unknown  n/A
